# Supplementary material
Source: publisher figshare collection journal article supplement (https://sage.figshare.com/ndownloader/files/22862441)
Supplement: Supplementary file 1 [file 22862441]

APPENDIX A

| Table A1: Relationship Satisfaction among WOMEN | | | | | | |  |
| --- | --- | --- | --- | --- | --- | --- | --- |
|  | Model 1  B  se | Model 2  B  se | Model 3  B  se | Model 4  B  se | Model 5  B  se | Model 6  B  se | Model 7  B  se |
| Partner’s Communication Quality | 0.64***  (0.04) |  |  | 0.66***  (0.04) | 0.64***  (0.04) | 0.64***  (0.04) | 0.62***  (0.04) |
| Actor’s Communication Quality | 0.05  (0.04) |  |  |  | 0.05  (0.04) |  | 0.05  (0.04) |
| Male Partner’s Share of Housework |  | 0.18***  (0.06) | 0.11  (0.06) | 0.02  (0.04) | 0.03  (0.05) | 0.00  (0.09) | 0.01  (0.05) |
| Partner’s Perceived Equity |  |  | 0.21*  (0.09) |  |  | 0.18*  (0.07) | 0.18*  (0.07) |
| Actor’s Perceived Equity |  |  | 0.44***  (0.09) |  |  | 0.10  (0.08) | 0.09  (0.08) |
| *p < .05; **p < .01; ***p < .001; All models include statistical controls. | | | | | | |  |
| Table A2: Relationship Satisfaction among MEN | | | | | | | |
|  | Model 1  B  se | Model 2  B  se | Model 3  B  se | Model 4  B  se | Model 5  B  se | Model 6  B  se | Model 7  B  se |
| Partner’s Communication Quality | 0.41***  (0.05) |  |  | 0.50***  (0.04) | 0.40***  (0.05) | 0.48***  (0.04) | 0.40***  (0.05) |
| Actor’s Communication Quality | 0.19***  (0.05) |  |  |  | 0.19***  (0.05) |  | 0.19***  (0.05) |
| Male Partner’s Share of Housework |  | -0.14**  (0.06) | -0.16**  (0.05) | -0.05  (0.05) | -0.08  (0.05) | -0.06  (0.05) | -0.08  (0.09) |
| Partner’s Perceived Equity |  |  | 0.27**  (0.09) |  |  | 0.06  (0.08) | -0.02  (0.08) |
| Actor’s Perceived Equity |  |  | 0.16  (0.09) |  |  | 0.14  (0.08) | 0.14  (0.08) |
| *p < .05; **p < .01; ***p < .001; All models include statistical controls. | | | | | | | |
